# Supplementary material for: A report on the use of a single intra-articular administration of autologous platelet therapy in a naturally occurring canine osteoarthritis model - a preliminary study
Source: BMC Musculoskelet Disord. 2020 Feb 27;21:127. doi: 10.1186/s12891-020-3140-9 (PMC7047415; doi:10.1186/s12891-020-3140-9)
Supplement: Supplementary file 2 — Additional file 2. Appendix b – the canine orthopedic index. [file 12891_2020_3140_MOESM2_ESM.pdf]

## APPENDIX B – THE CANINE ORTHOPEDIC INDEX

### Description of Stiffness:

The following questions concern the amount of joint stiffness your dog has experienced in the **past 7 days**.

Stiffness is the restriction or slowness in the ease with which your dog moves his/her joints.

Please select **one** answer for each question below.

1. How severe is your dog's stiffness after first wakening **in the morning**?
  - None;
  - Mild;
  - Moderate;
  - Severe;
  - Extreme.
2. **Later in the day**, how severe is your dog's stiffness after lying down for at least 15 minutes?
  - None;
  - Mild;
  - Moderate;
  - Severe;
  - Extreme.
3. How much of a problem does your dog have **rising to standing** after lying down for at least 15 minutes?
  - No problems;
  - Mild problems;
  - Moderate problems;

- Severe problems;
  - Extreme problems.
4. In general, over the past 7 days, how much difficulty has your dog had with his or her joints?
- None;
  - Mild;
  - Moderate;
  - Severe;
  - Extreme.

**Description of Function:**

Please indicate how much of a problem each of the following activities has been for your dog over the **past 7 days**.

Please select **one** answer for each question below.

5. **Jumping up** (as in getting into the car or onto the bed)?
- No problems;
  - Mild problems;
  - Moderate problems;
  - Severe problems;
  - Extreme problems.
6. **Jumping down** (as in getting out of the car or off of the bed)?
- No problems;
  - Mild problems;
  - Moderate problems;

- Severe problems;
- Extreme problems.

7. **Climbing up** (as in stairs, ramps or curbs)?

- No problems;
- Mild problems;
- Moderate problems;
- Severe problems;
- Extreme problems.

8. **Climbing down** (as in stairs, ramps or curbs)?

- No problems;
- Mild problems;
- Moderate problems;
- Severe problems;
- Extreme problems.

**Description of Gait:**

The following questions concern your dog's gait over **past 7 days**.

Gait refers to the manner in which your dog uses its legs as it moves

Please select **one** answer for each question below.

9. On average, how severe was your dog's limp **during** mild activities (such as short walks)?

- None;
- Mild;
- Moderate;
- Severe;
- Extreme.

10. On average, how severe was your dog's limp **during** mild activities (such as long walks, playing or running)?

- None;
- Mild;
- Moderate;
- Severe;
- Extreme.

11. How often did your dog limp **the day after** moderate activities (such as long walks, playing or running)?

- Never;
- Rarely;
- Occasionally;
- Frequently;
- Constantly.

12. How often have you been aware of your dog's joint problems?

- Never;
- Rarely;
- Occasionally;
- Frequently;
- Constantly.

13. How often did your dog 'pay' for over-activity, with increased pain or stiffness the following day?

- Never;
- Rarely;
- Occasionally;

- Frequently;
- Constantly.

**Description of Quality of Life:**

Please select **one** answer for each question below.

14. In the past 7 days, what has been your level of concern that your dog's joint problems will shorten his or her life?

- None;
- Mild;
- Moderate;
- Severe;
- Extreme.

15. In the past 7 days, what has been your level of concern that your dog is generally slowing down?

- None;
- Mild;
- Moderate;
- Severe;
- Extreme.

16. Overall, how would you rate your dog's quality of life over the past 7 day?

- Excellent;
- Very Good;
- Good;
- Fair;
- Poor.
