# Supplementary material for: A report on the use of a single intra-articular administration of autologous platelet therapy in a naturally occurring canine osteoarthritis model - a preliminary study
Source: BMC Musculoskelet Disord. 2020 Feb 27;21:127. doi: 10.1186/s12891-020-3140-9 (PMC7047415; doi:10.1186/s12891-020-3140-9)
Supplement: Supplementary file 3 — Additional file 3. Appendix c – liverpool osteoarthritis in dogs. [file 12891_2020_3140_MOESM3_ESM.pdf]

## APPENDIX C – LIVERPOOL OSTEOARTHRITIS IN DOGS

### Mobility:

Generally

1. How is your dog's mobility in general?

- Very good;
- Good;
- Fair;
- Poor;
- Very poor.

2. How disabled is your dog by his/her lameness?

- Not at all disabled;
- Slightly disabled;
- Moderately disabled;
- Severely disabled;
- Extremely disabled;

3. How active is your dog?

- Extremely active;
- Very active;
- Moderately active;
- Slightly active;
- Not at all active;

4. What is the effect of cold, damp weather on your dog's lameness?

- No effect;
- Mild effect;
- Moderate effect;
- Severe effect;
- Extreme effect;

5. To what degree does your dog show stiffness in the affected leg after a 'lie down'?

- No stiffness;
- Mild stiffness;
- Moderate stiffness;
- Severe stiffness;
- Extreme stiffness;

At exercise

6. At exercise, how active is your dog?

- Extremely active;
- Very active;
- Fairly active;
- Not very active;
- Not at all active;

7. How keen to exercise is your dog?

- Extremely keen;
- Very keen;

- Fairly keen;
- Not very keen;
- Not at all keen.

8. How would you rate your dog's ability to exercise?

- Very good;
- Good;
- Fair;
- Poor;
- Very poor;

9. What overall effect does exercise have on your dog's lameness?

- No effect;
- Mild effect;
- Moderate effect;
- Severe effect;
- Extreme effect.

10. How often does your dog rest (stop/sit down) during exercise?

- Never;
- Hardly ever;
- Occasionally;
- Frequently;
- Very frequently.

11. What is the effect of cold, damp weather on your pet's ability to exercise?

- No effect;
- Mild effect;
- Moderate effect;
- Severe effect;
- Extreme effect.

12. To what degree does your dog show stiffness in the affected leg after a 'lie down' following exercise?

- No stiffness;
- Mild stiffness;
- Moderate stiffness;
- Severe stiffness;
- Extreme stiffness;

13. What is the effect of your dog's lameness on his/her ability to exercise?

- No effect;
- Mild effect;
- Moderate effect;
- Severe effect;
- Extreme effect.
