# Supplementary material for: A report on the use of a single intra-articular administration of autologous platelet therapy in a naturally occurring canine osteoarthritis model - a preliminary study
Source: BMC Musculoskelet Disord. 2020 Feb 27;21:127. doi: 10.1186/s12891-020-3140-9 (PMC7047415; doi:10.1186/s12891-020-3140-9)
Supplement: Supplementary file 4 — Additional file 4. Appendix d – hudson visual analogue scale. [file 12891_2020_3140_MOESM4_ESM.pdf]

## APPENDIX D – HUDSON VISUAL ANALOGUE SCALE

### Hudson Visual Analogue Scale

1. How would you describe your **overall assessment** of your dog in the **last month**? (0-10, 0 = bad, 10 = good)
2. What kind of **mood** has your dog been in the last month? (0-10, 0 = bad, 10 = good)
3. How has your dog' s attitude been in the last month? (0-10, 0 = bad, 10 = good)
4. How frequently does your dog display comfort or “happy dog” postures (e.g., lying on back with toy in mouth? (0-10, 0 = bad, 10 = good)

Tell us what type of daily activities your dog engages in (e.g., fetching newspapers, playing frisbee) and then answer question 5.

5. Has your dog **changed the amount** of these activities? (0-10, 0 = not at all, 10 = a lot)
6. How willing is your dog to **play voluntarily**? (0-10, 0 = not at all, 10 = a lot)
7. How **often** does your dog get **exercise**? (0-10, 0 = not at all, 10 = a lot)

8. How **stiff** is your dog when **arising for the day** (0-10, 0 = not at all, 10 = a lot)
9. How **stiff** is your dog **at the end of the day** (post-activities)? (0-10, 0 = not at all, 10 = a lot)
10. Does your dog indicate any **lameness at a walk**? (0-10, 0 = not at all, 10 = a lot)
11. Does your dog indicate any **pain when turning suddenly at a walk**? (0-10, 0 = not at all, 10 = a lot)
